# Supplementary material for: ADP is the dominant controller of AMP-activated protein kinase activity dynamics in skeletal muscle during exercise
Source: PubMed Central journal article supplement (PMC7433884; doi:10.1371/journal.pcbi.1008079), 2020-07-30

# Unconstrained Range (Dissociation Constants)

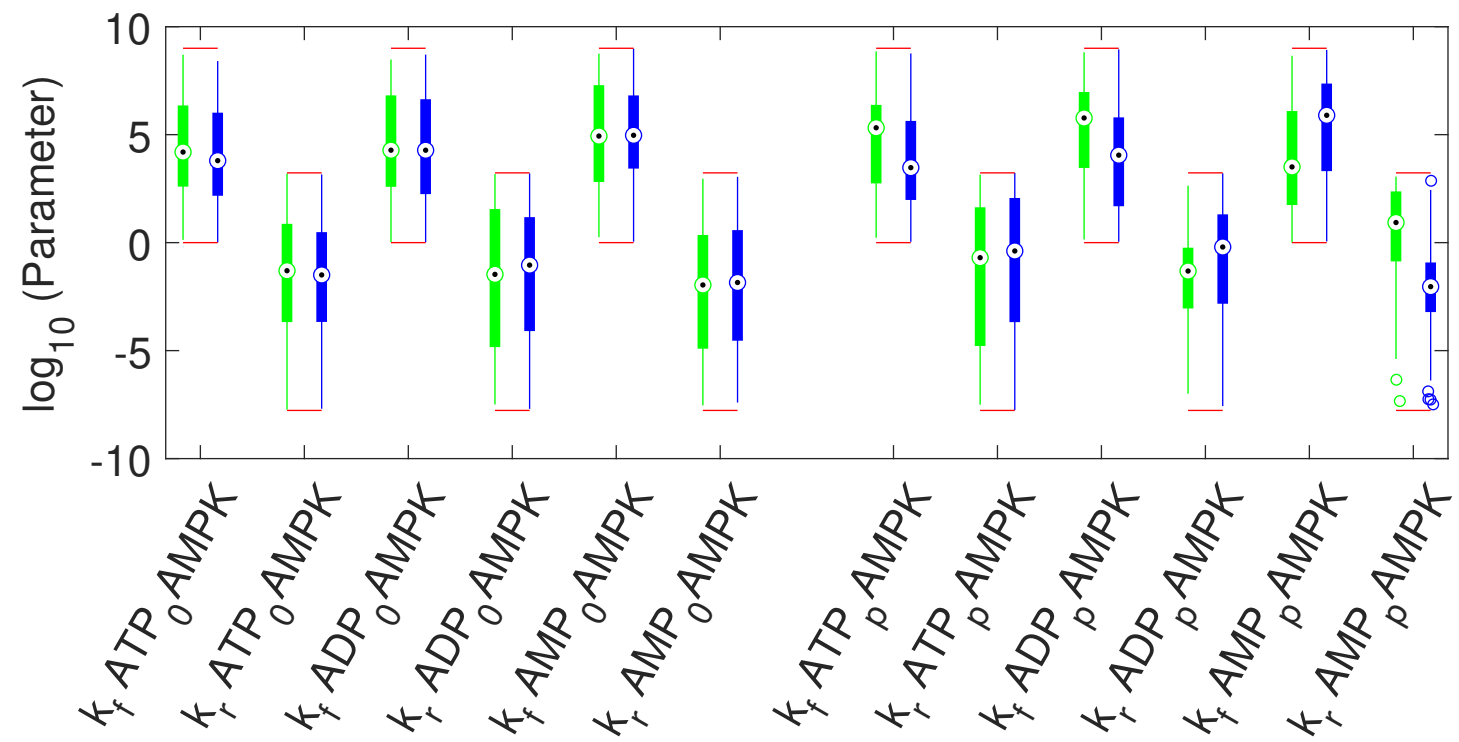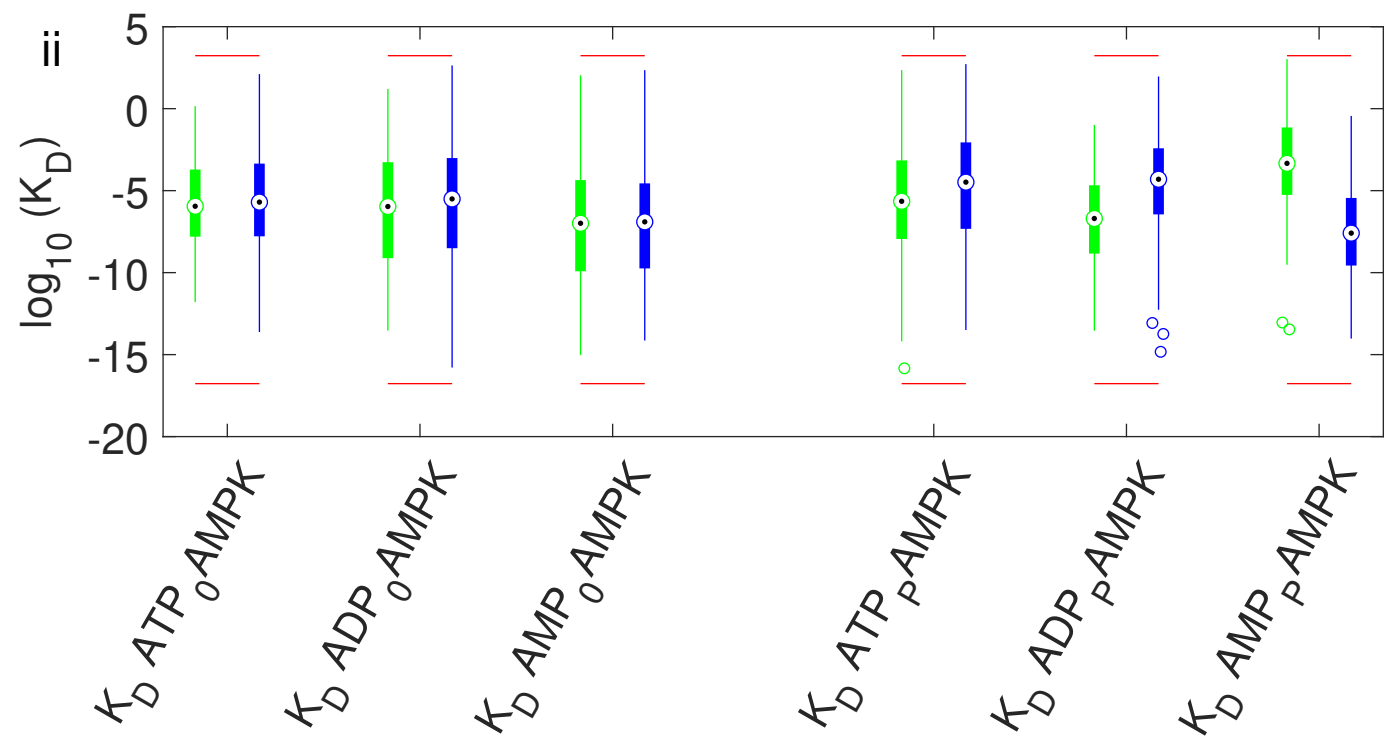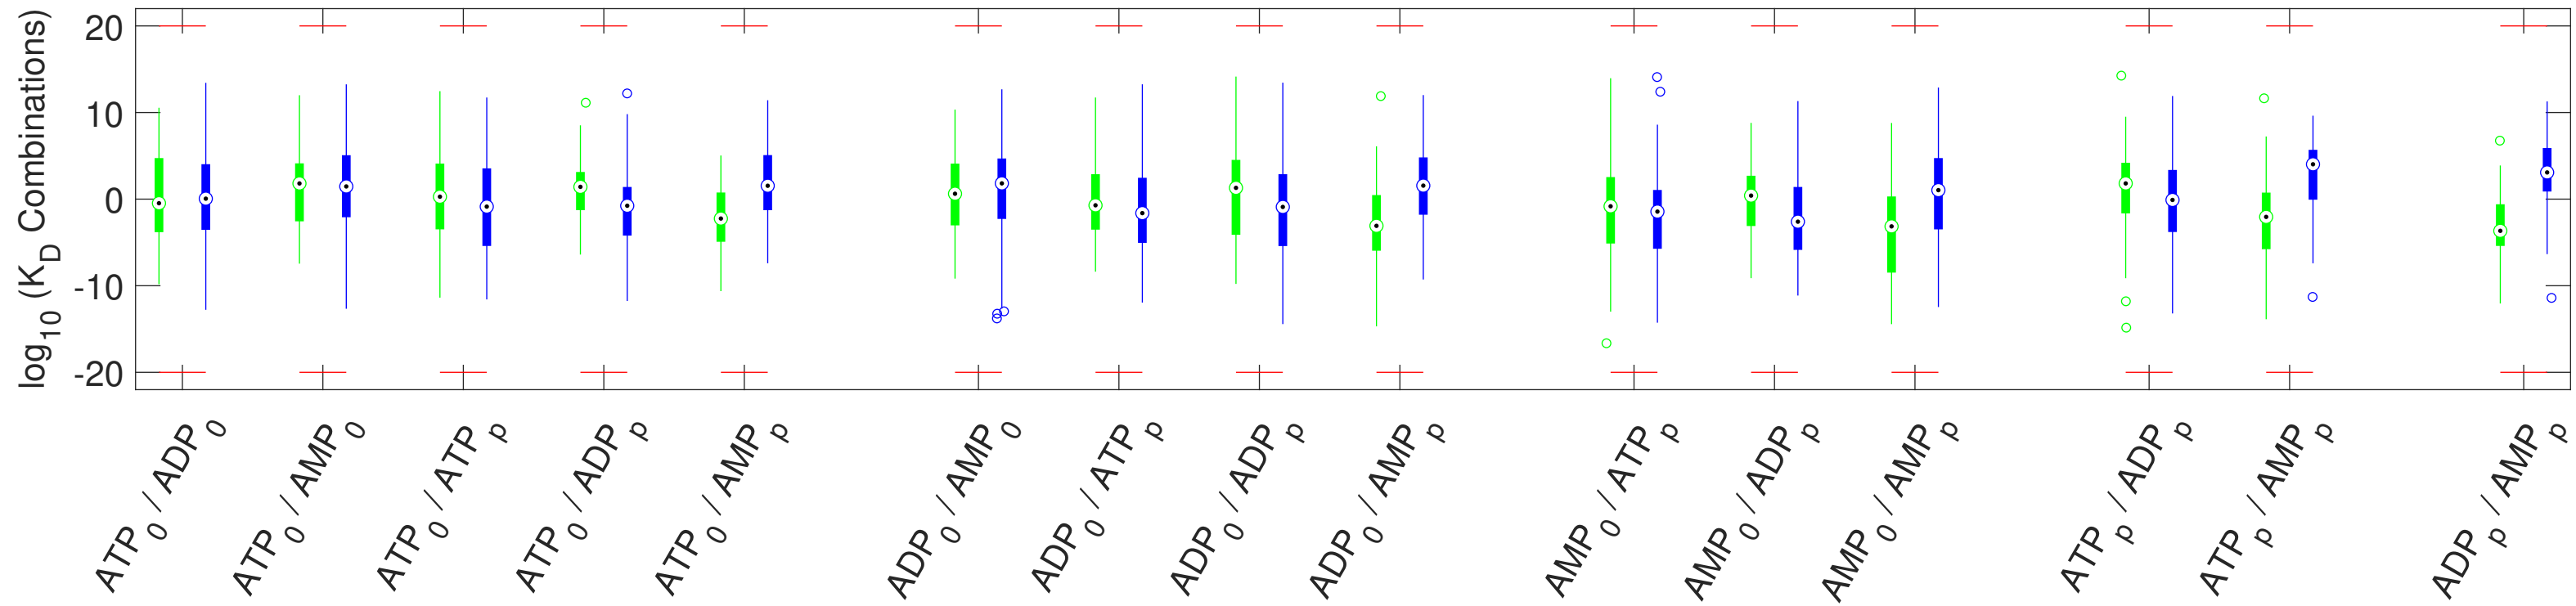

# Unconstrained Range (Phosphorylation Kinetics)

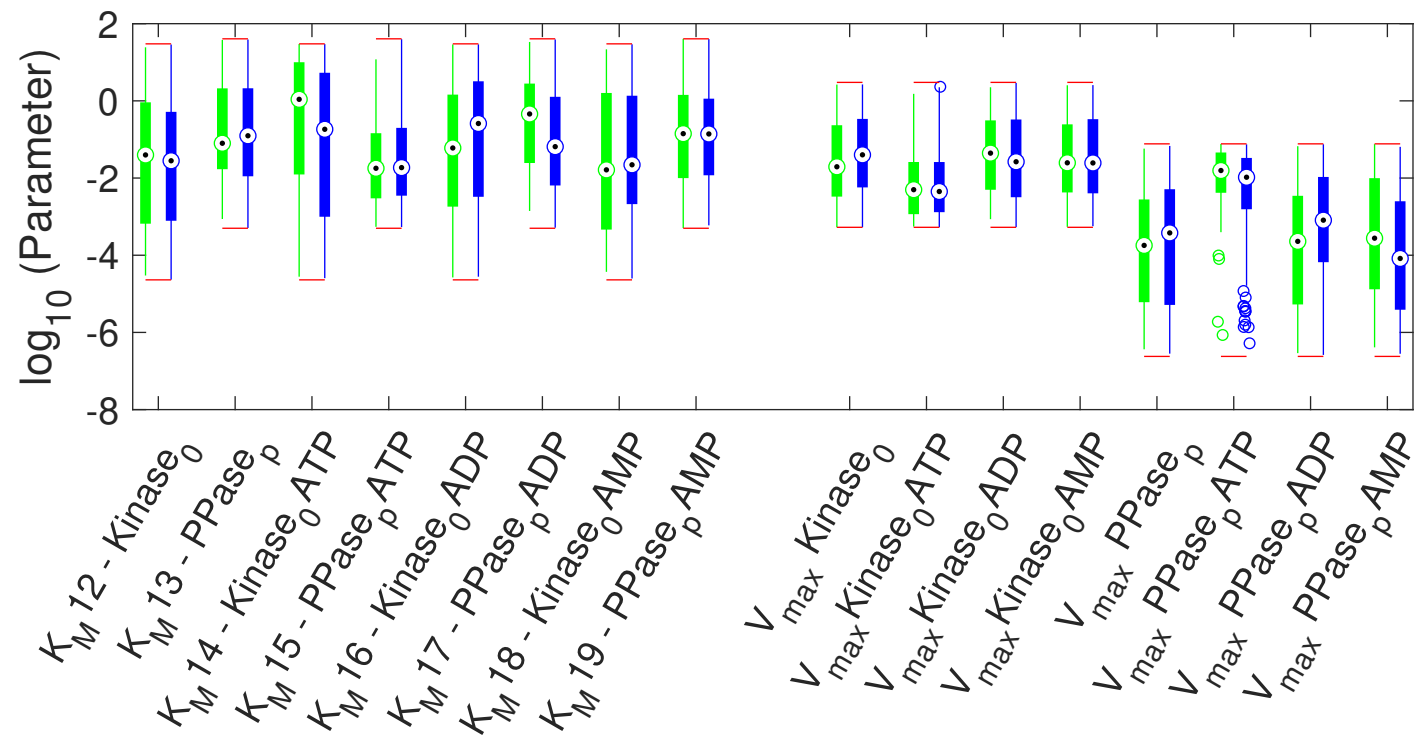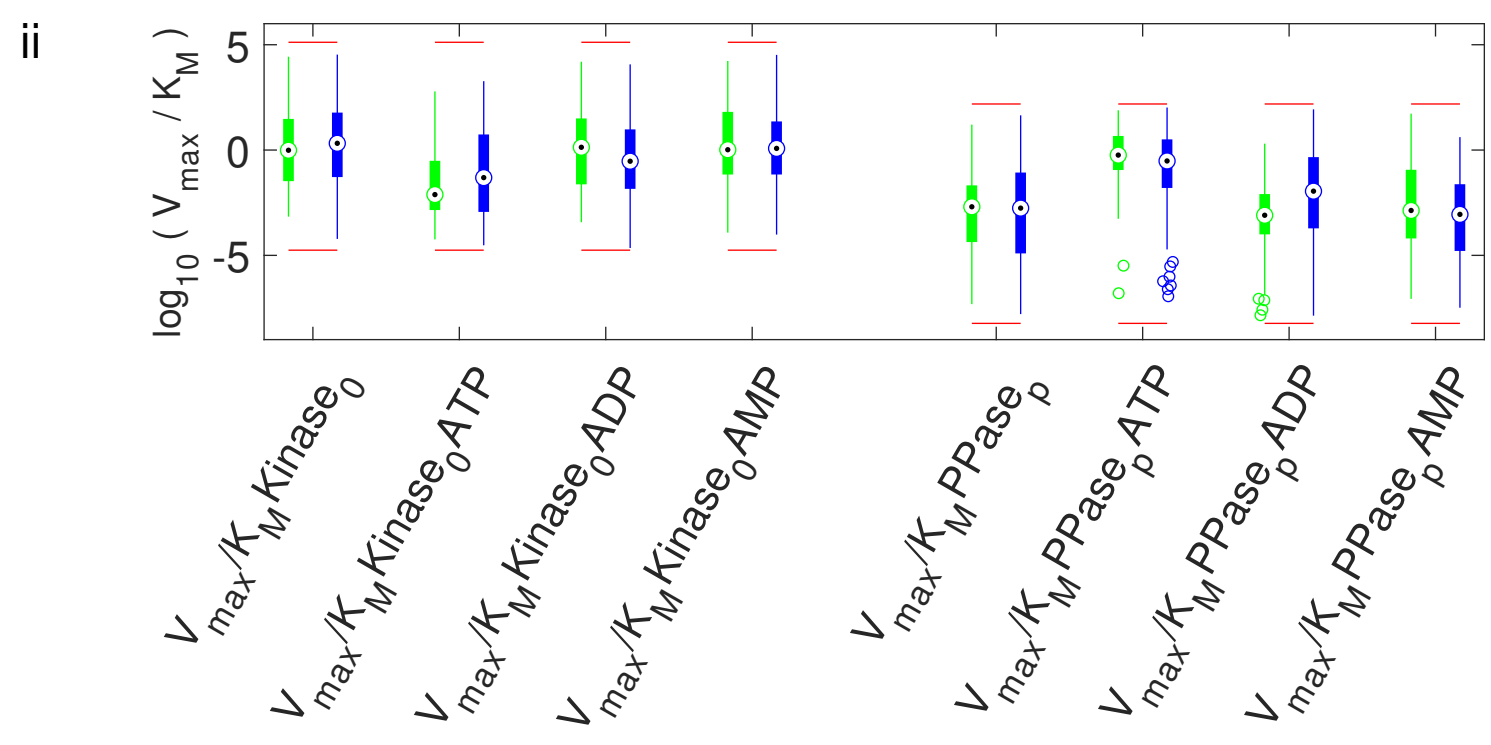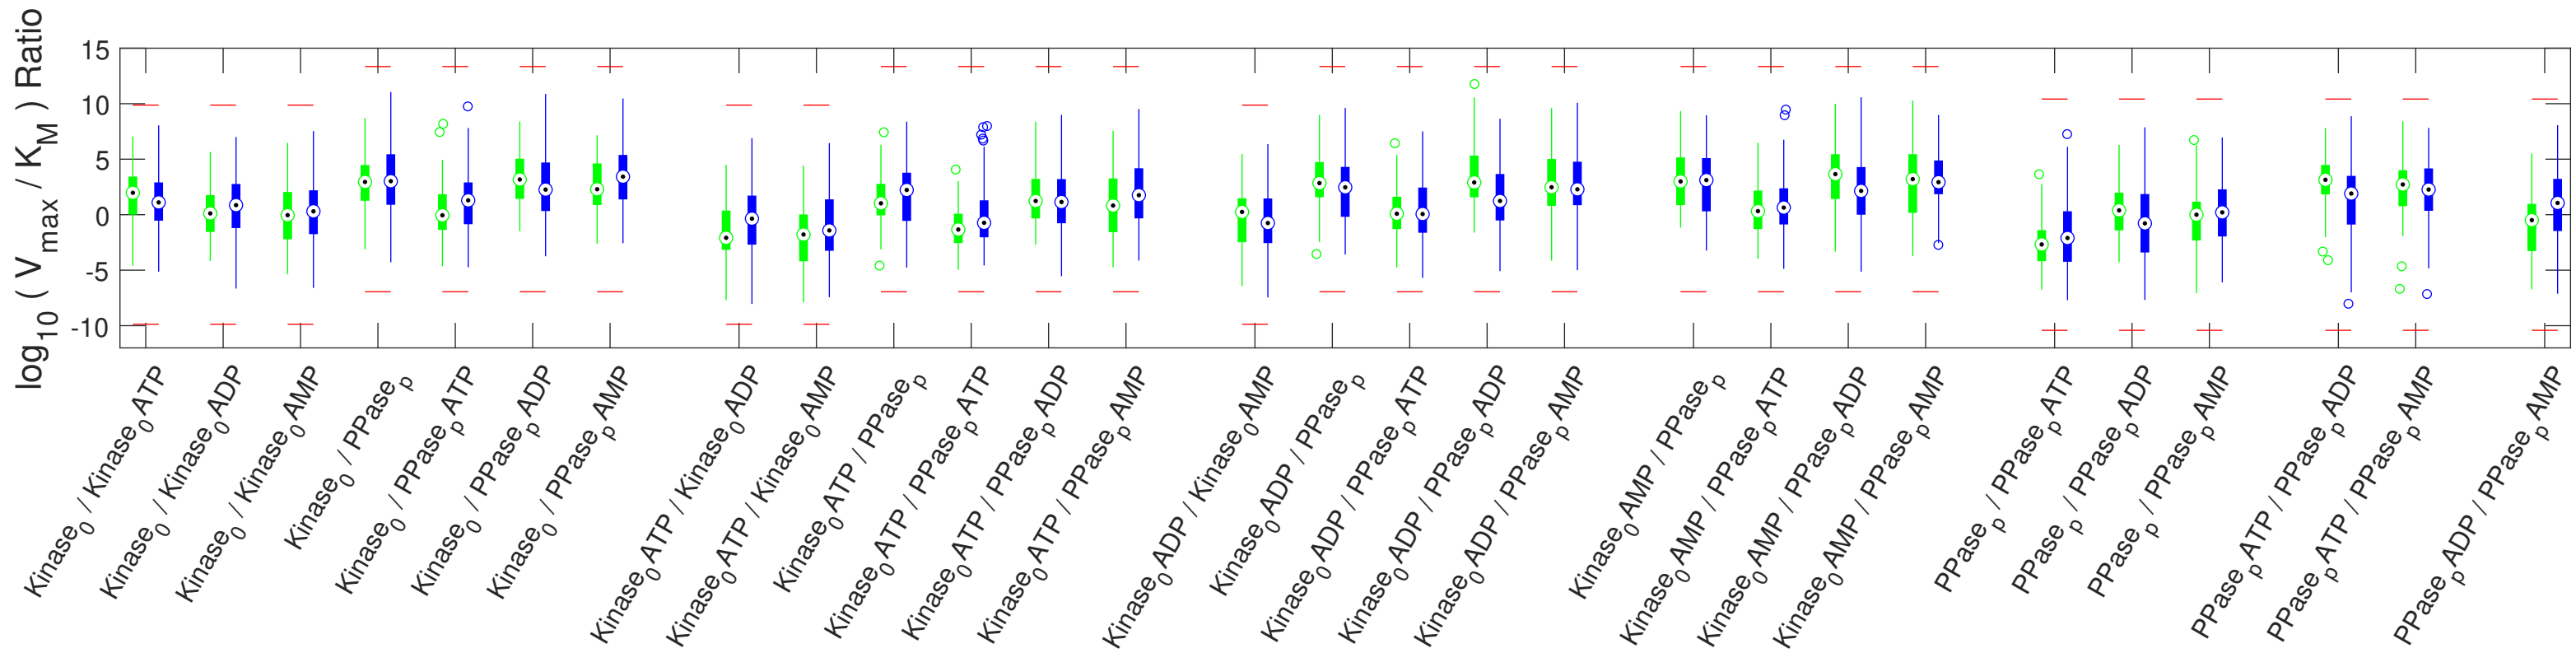

# Unconstrained Range (Signal Concentration and Allosteric Activation)

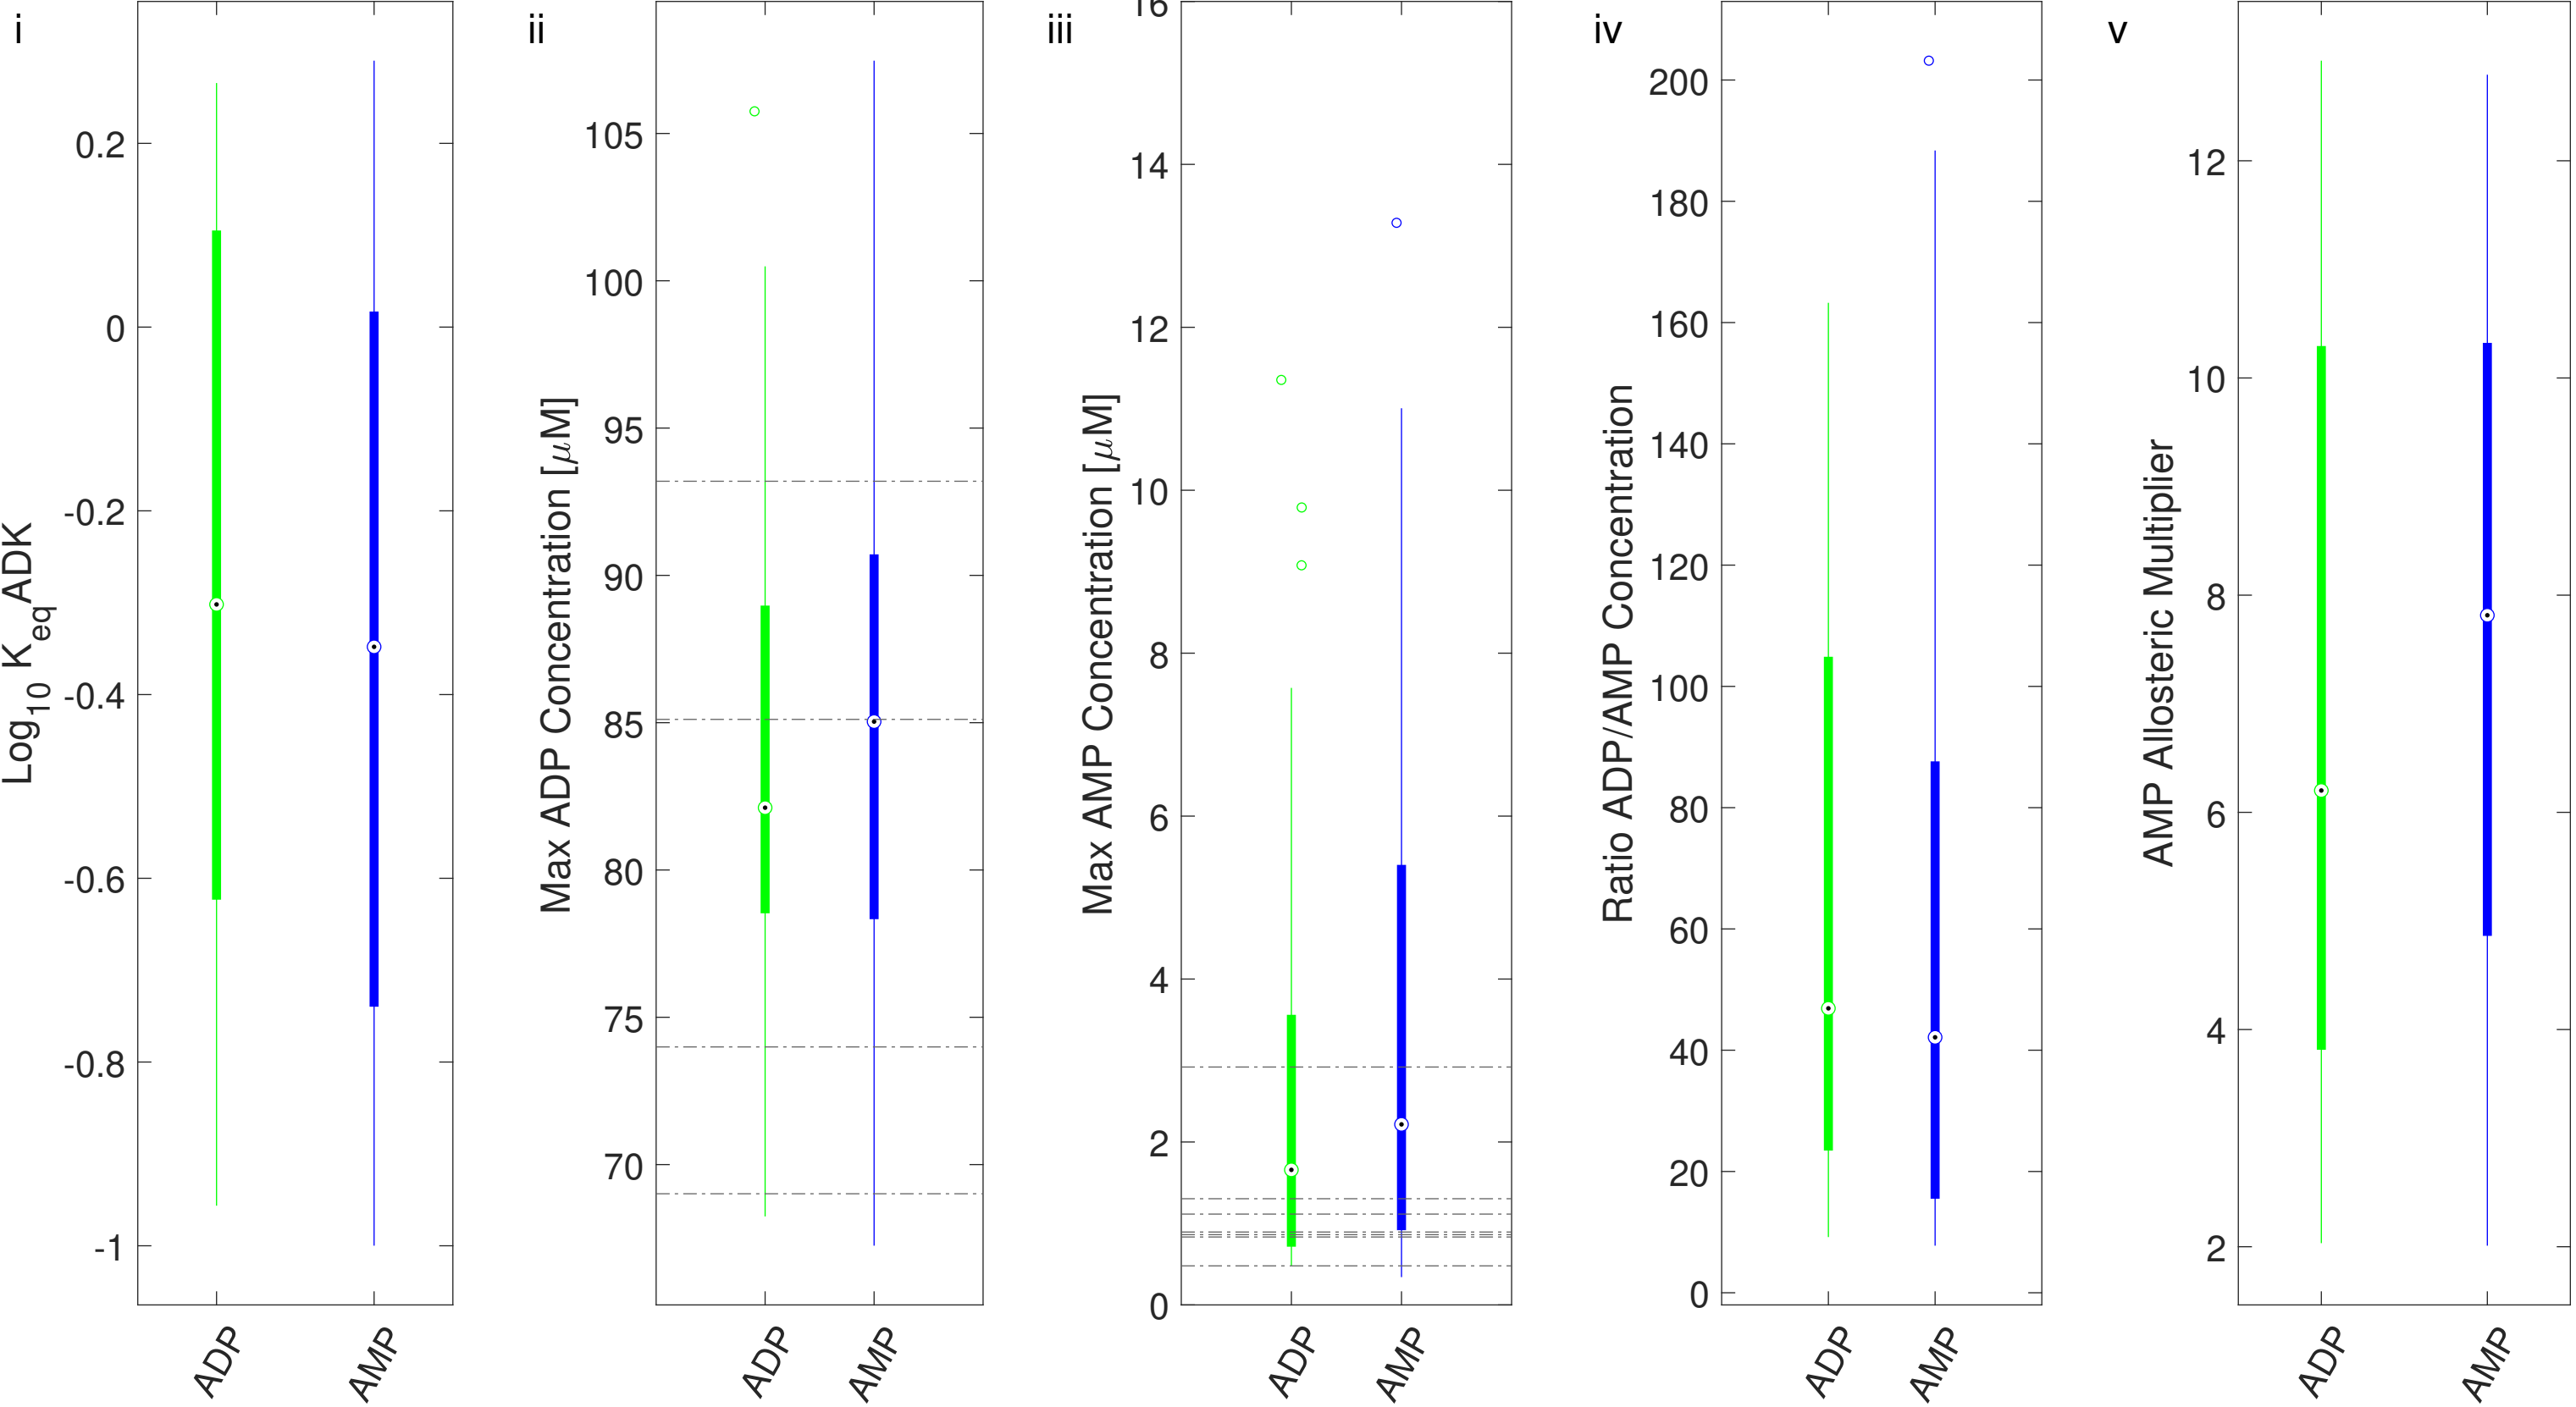

Supplement: pcbi.1008079.s004.pdf [file pcbi.1008079.s004.pdf]
