# Supplementary material for: ADP is the dominant controller of AMP-activated protein kinase activity dynamics in skeletal muscle during exercise
Source: PubMed Central journal article supplement (PMC7433884; doi:10.1371/journal.pcbi.1008079), 2020-07-30

$\alpha_1\beta_2\gamma_1$  1.1x (Dissociation Constants)

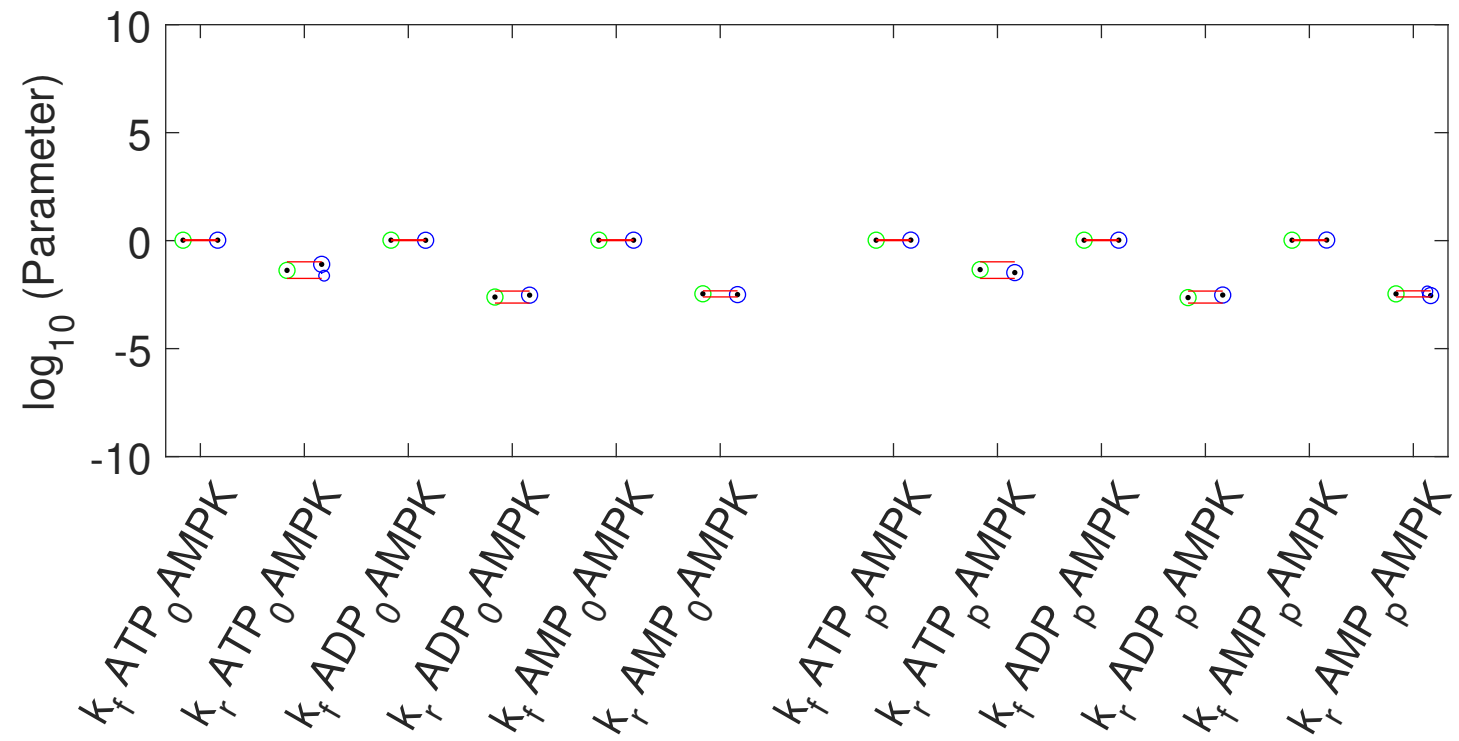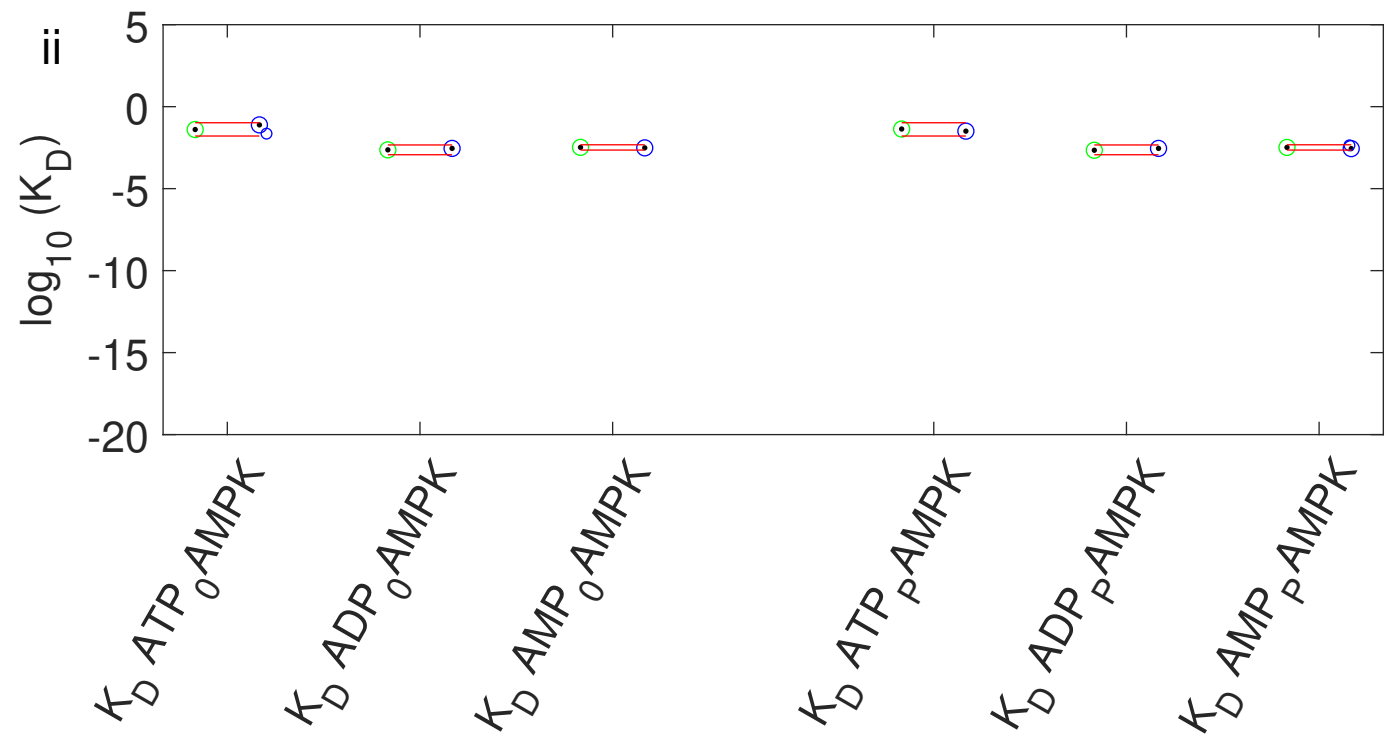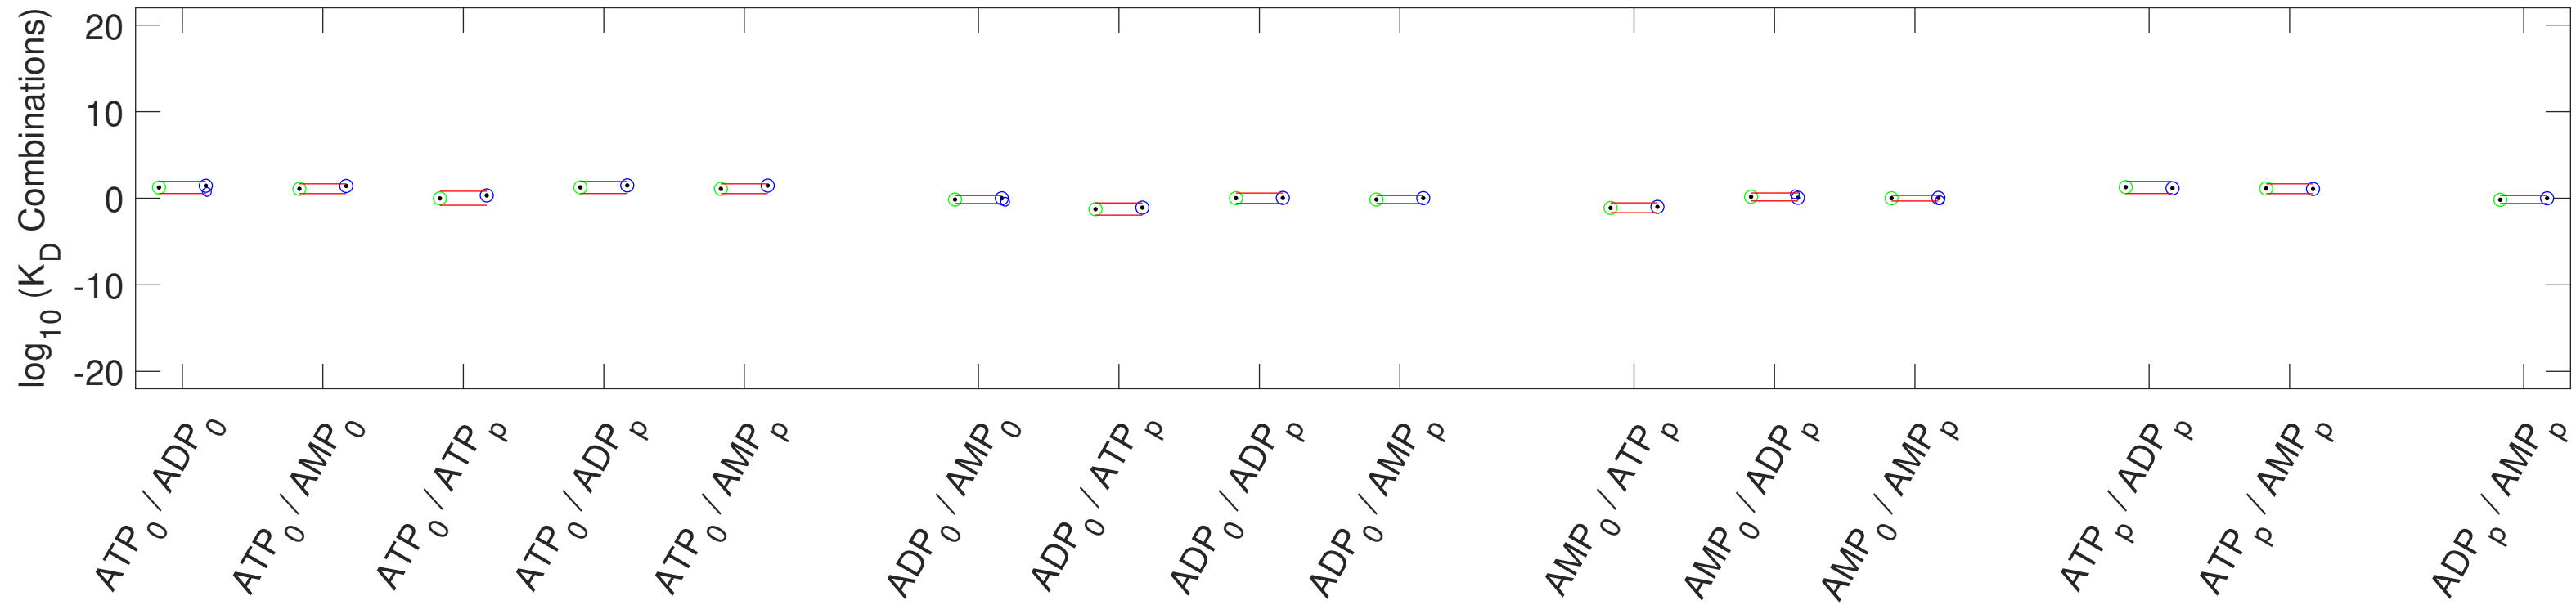

$\alpha 1 \beta 2 \gamma 1$  1.1x (Phosphorylation Kinetics)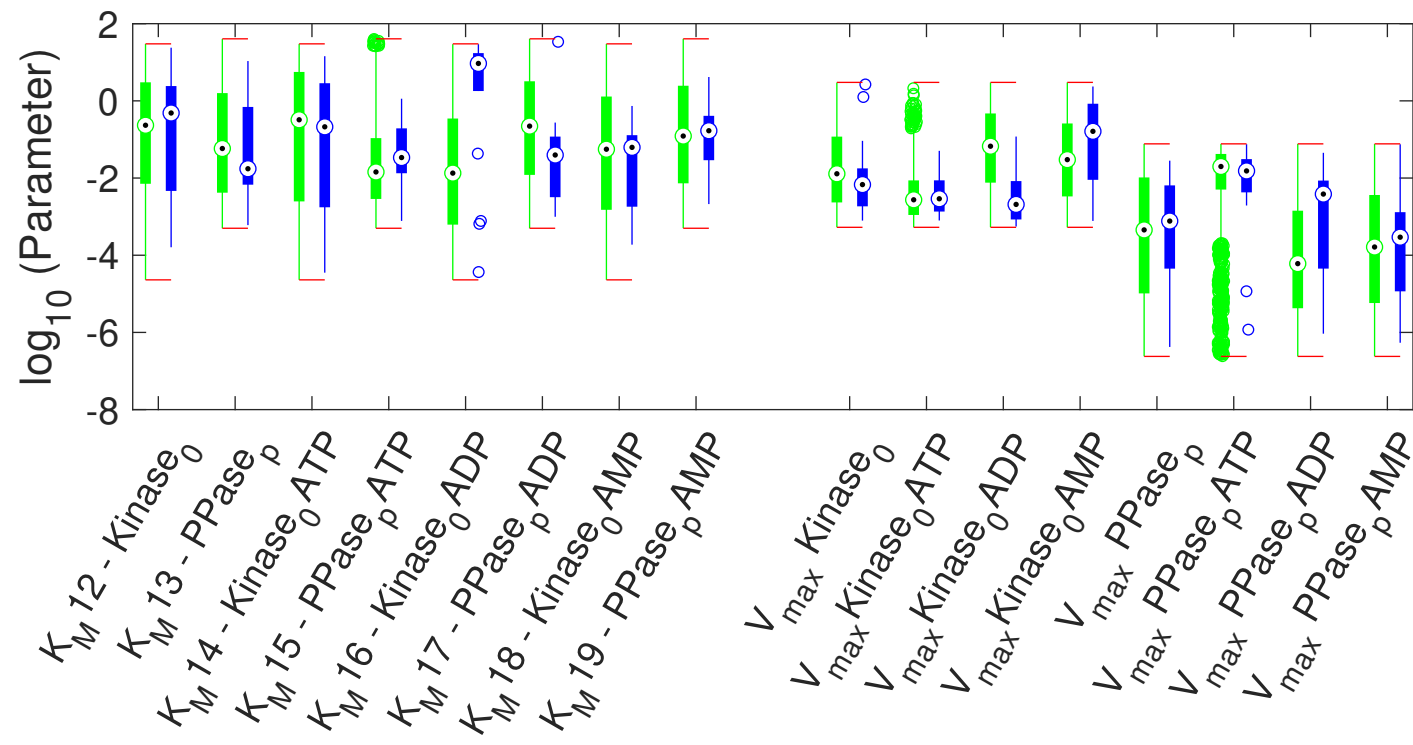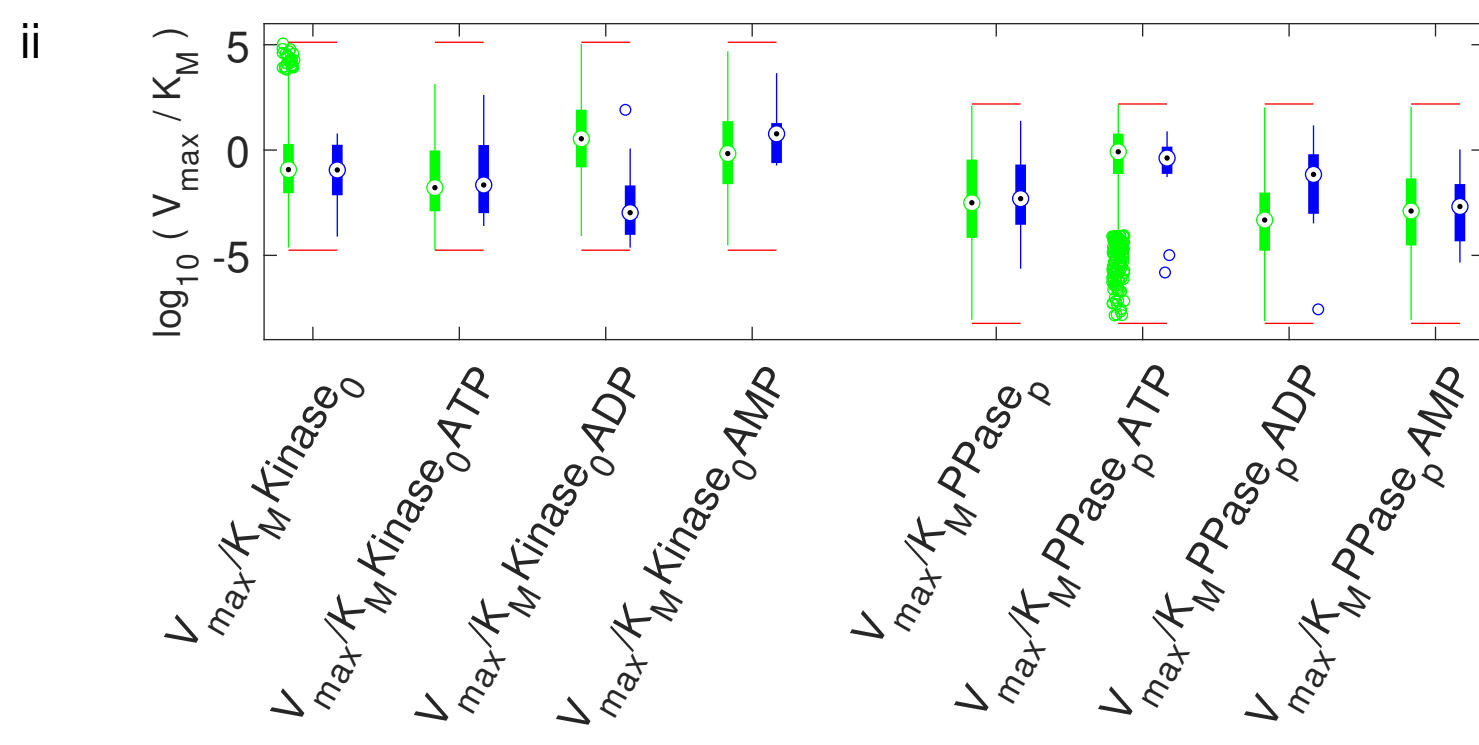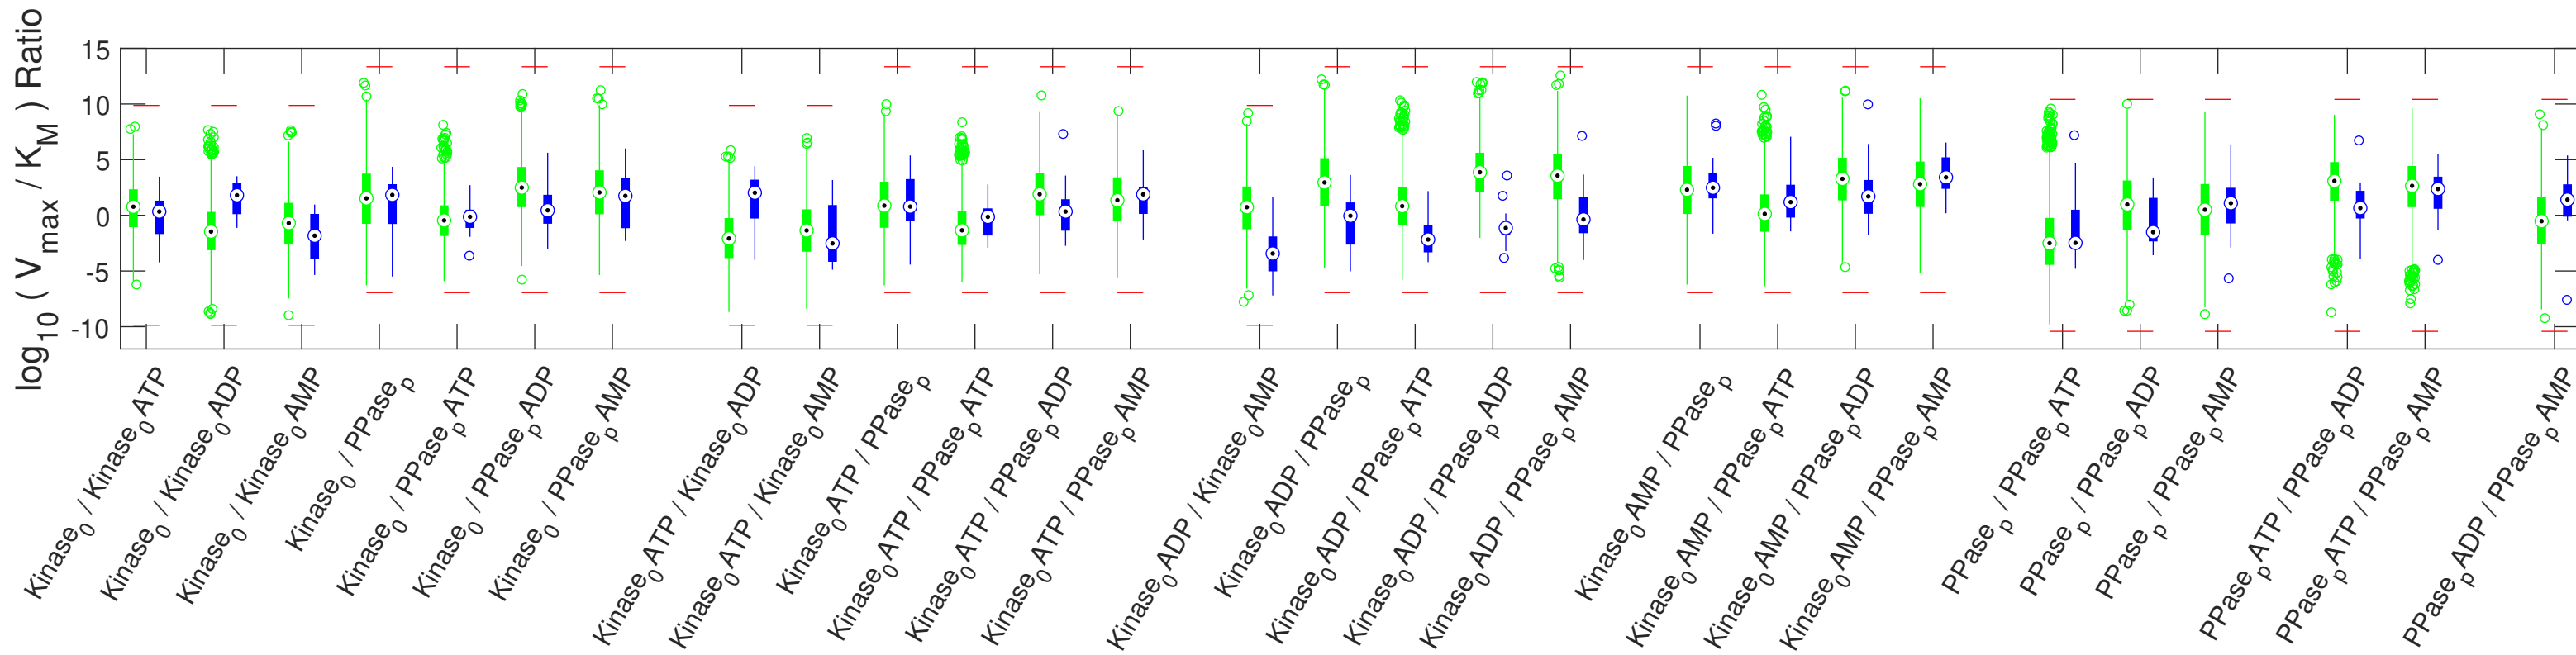

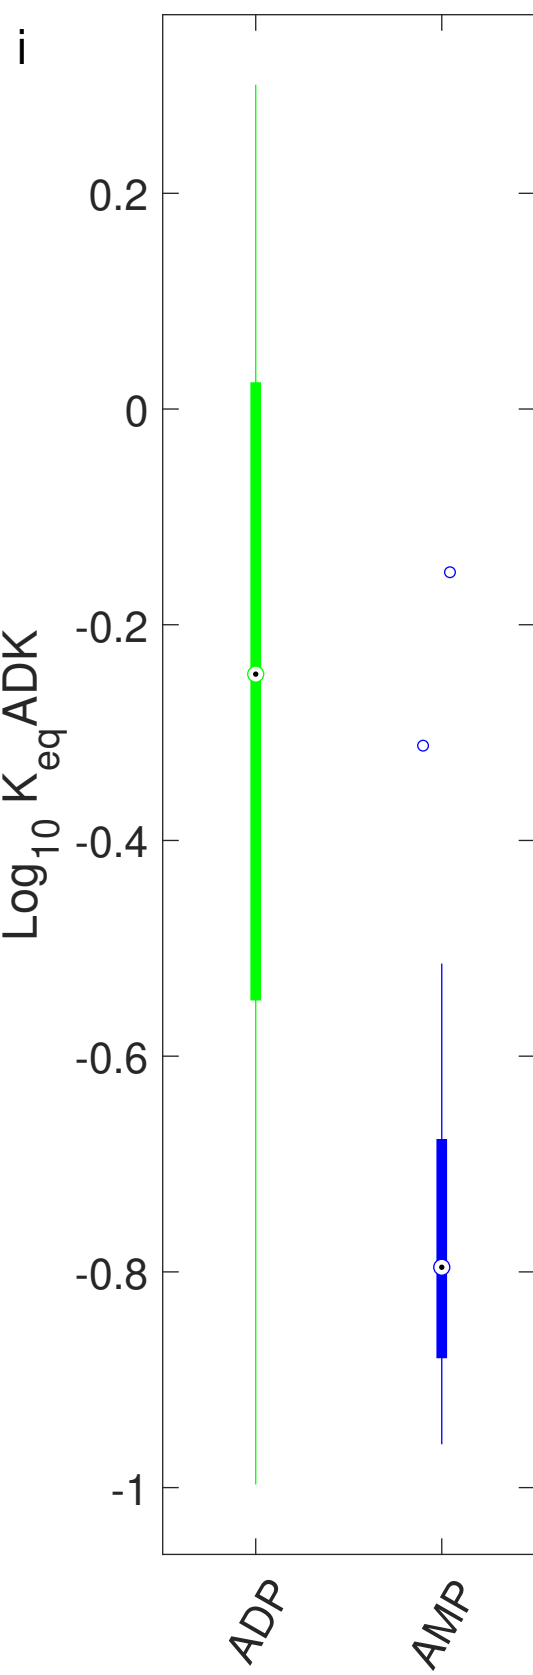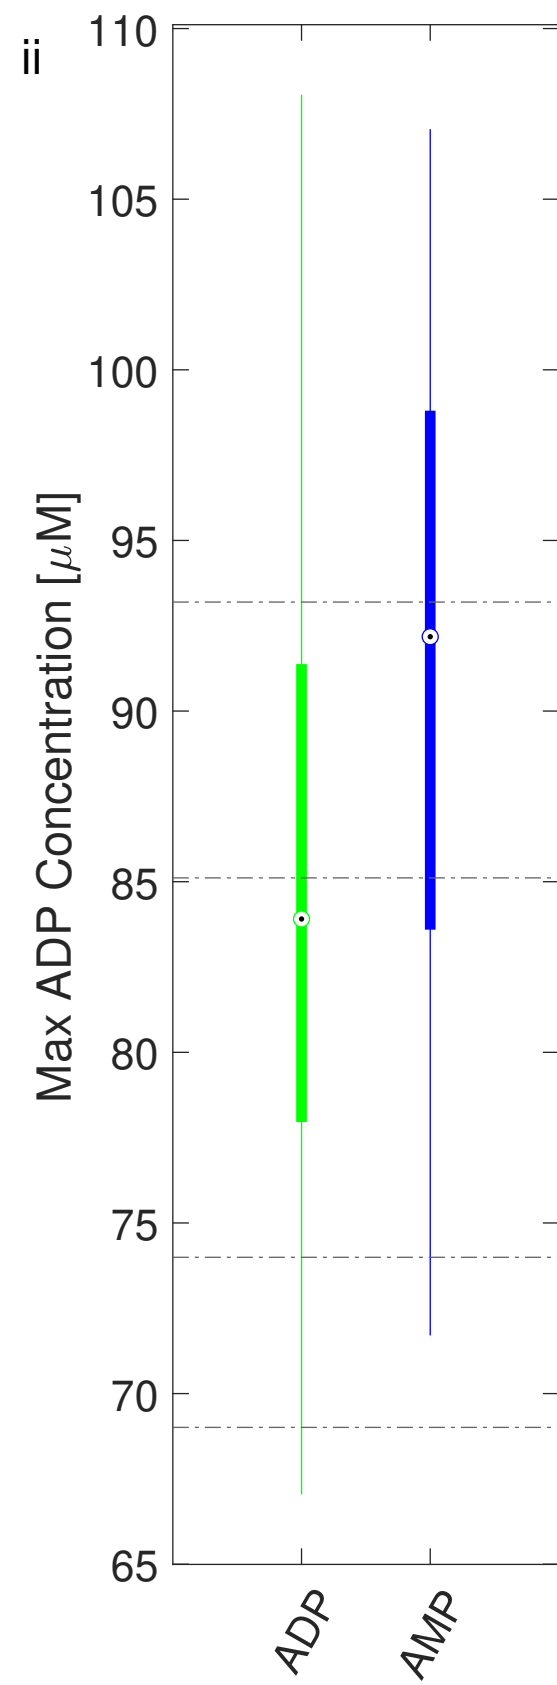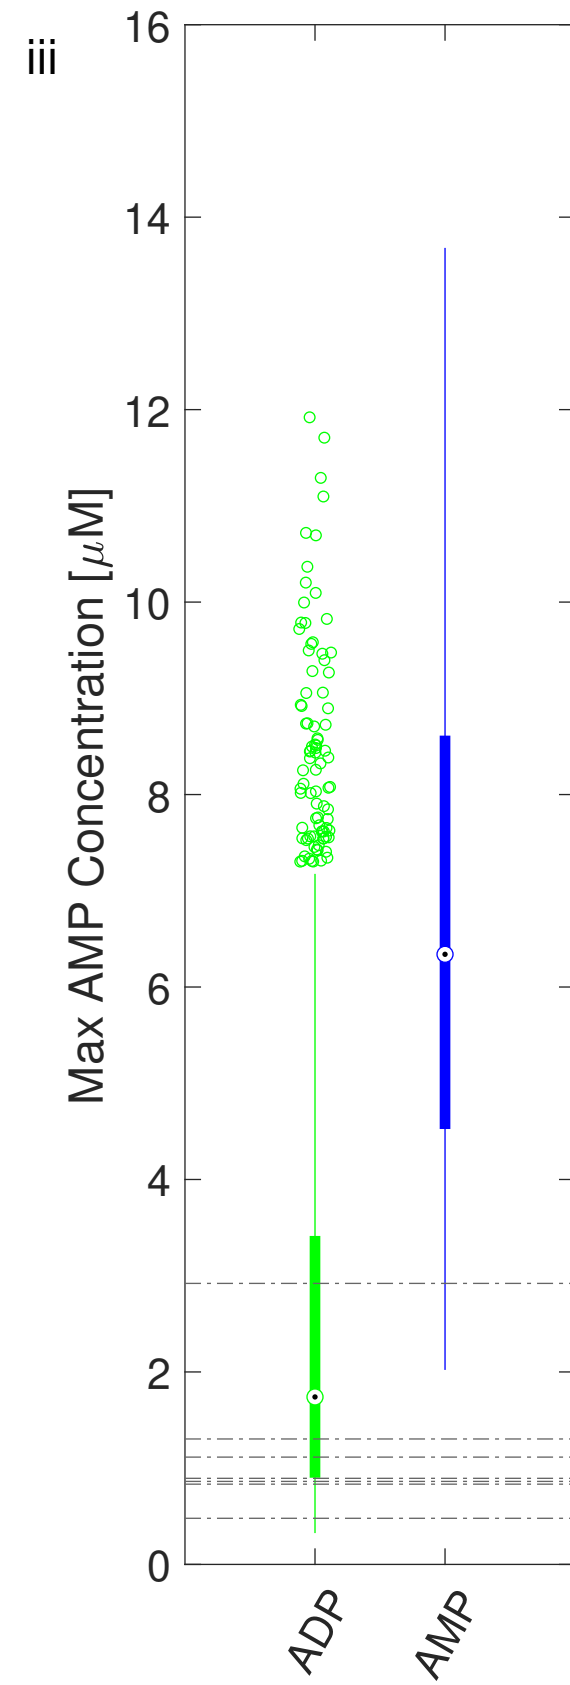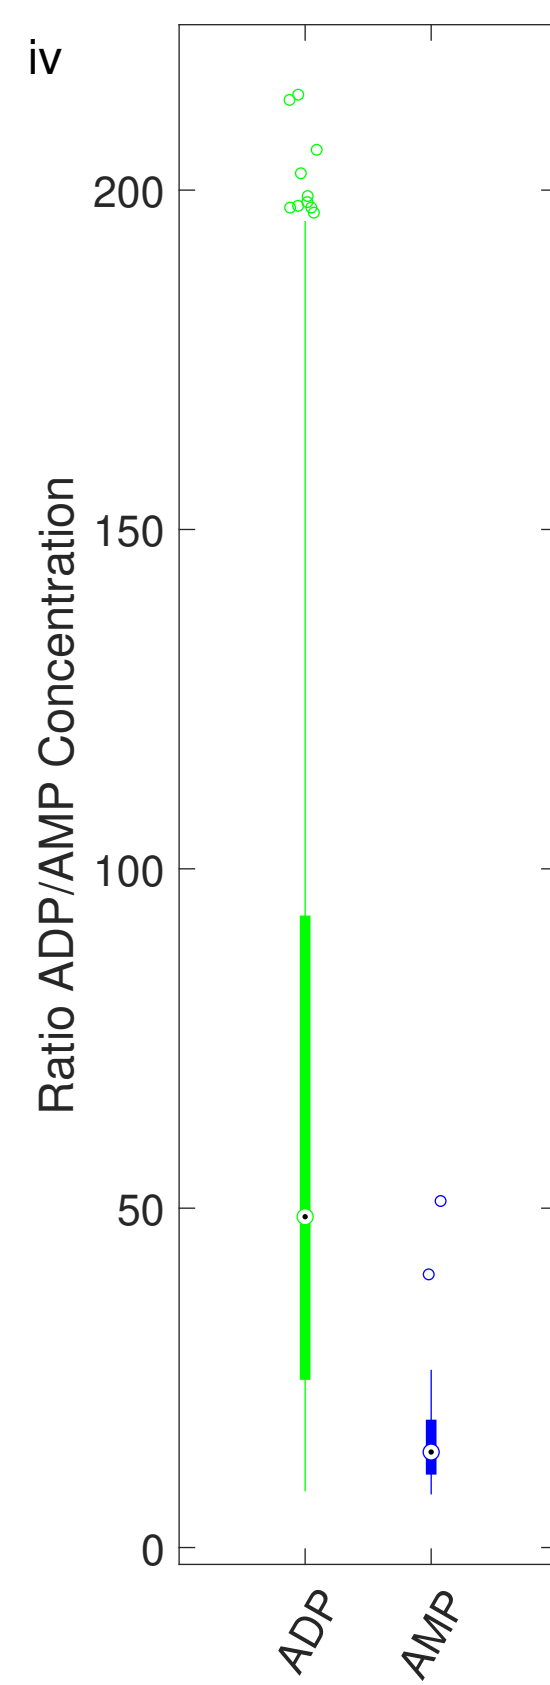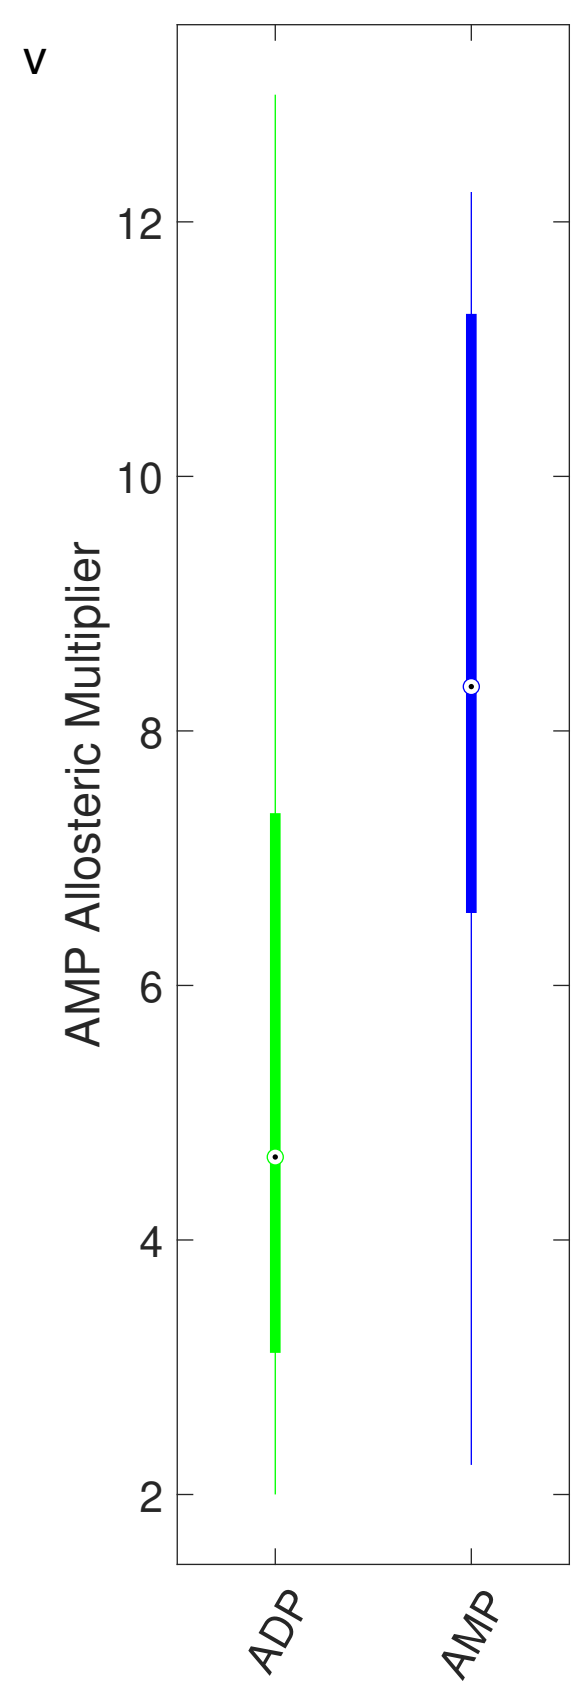

Supplement: pcbi.1008079.s005.pdf [file pcbi.1008079.s005.pdf]
