# Supplementary material for: ADP is the dominant controller of AMP-activated protein kinase activity dynamics in skeletal muscle during exercise
Source: PubMed Central journal article supplement (PMC7433884; doi:10.1371/journal.pcbi.1008079), 2020-07-30

$\alpha 2\beta 2\gamma 3$  1.1x (Dissociation Constants)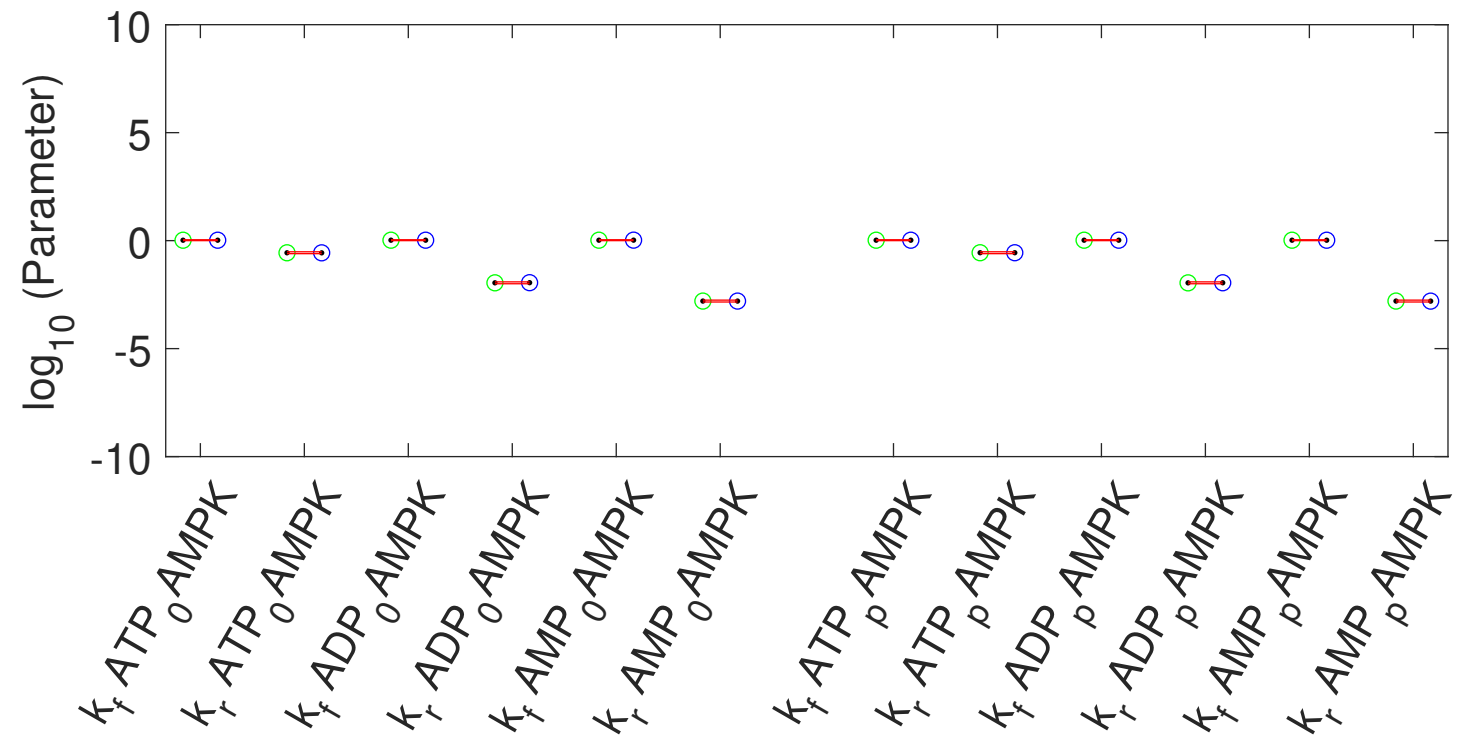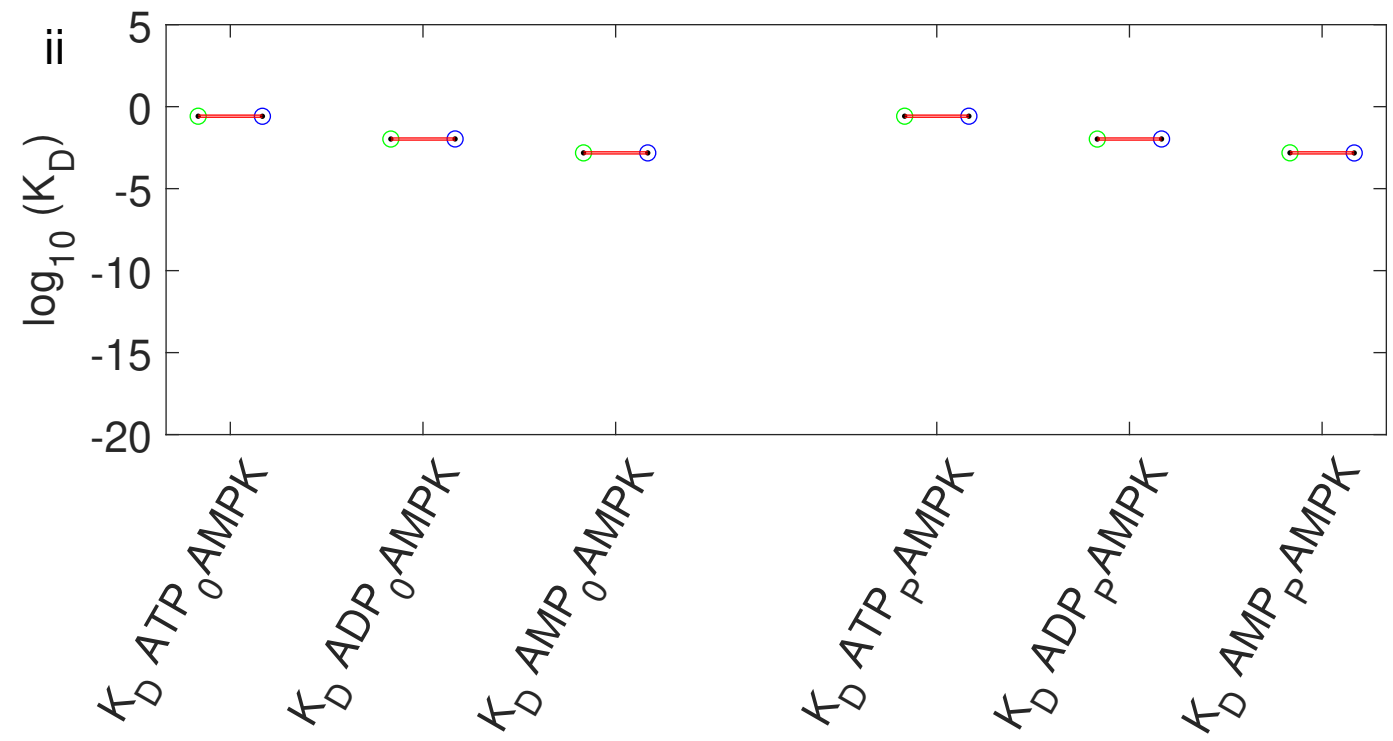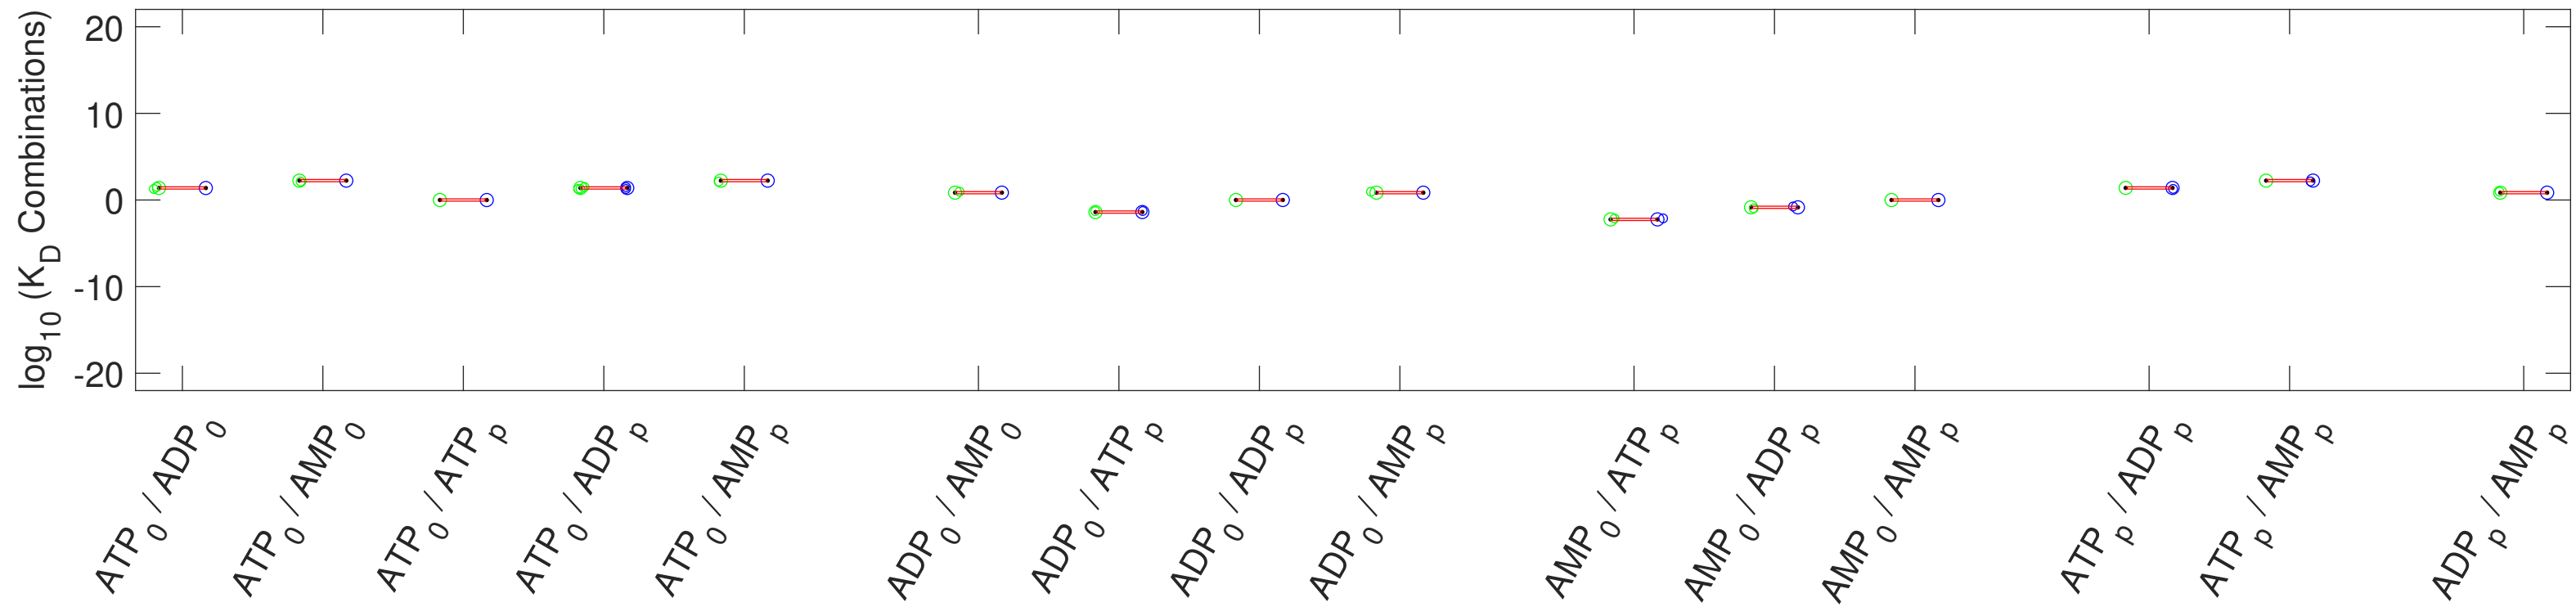

$\alpha 2 \beta 2 \gamma 3$  1.1x (Phosphorylation Kinetics)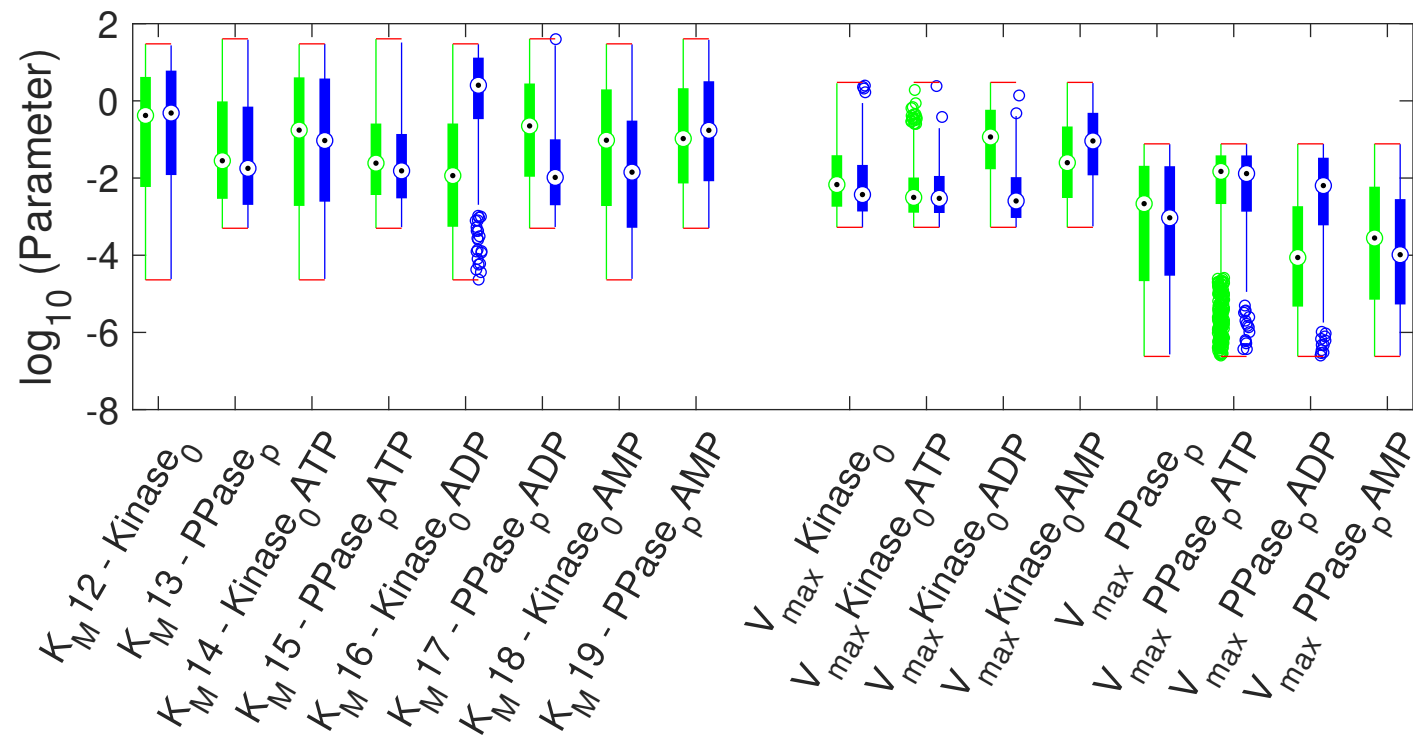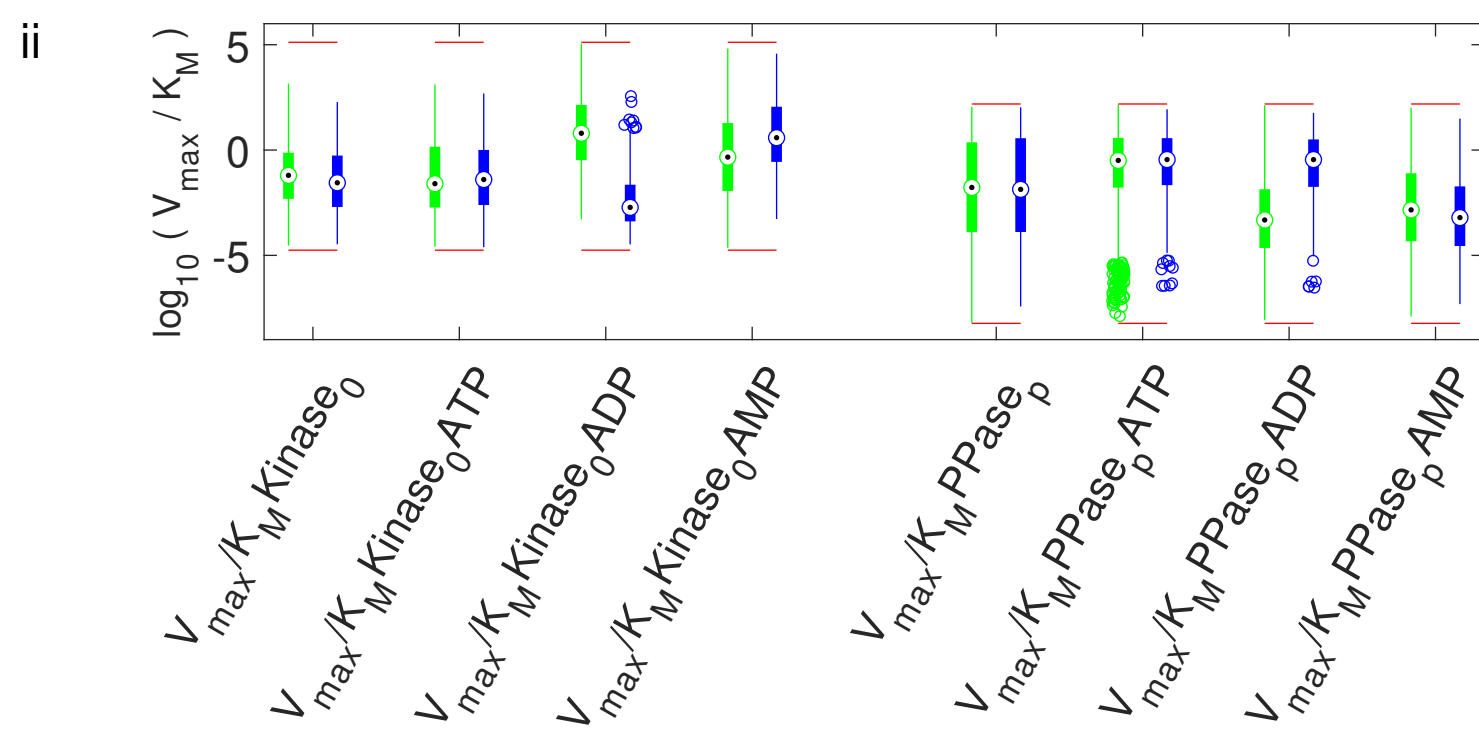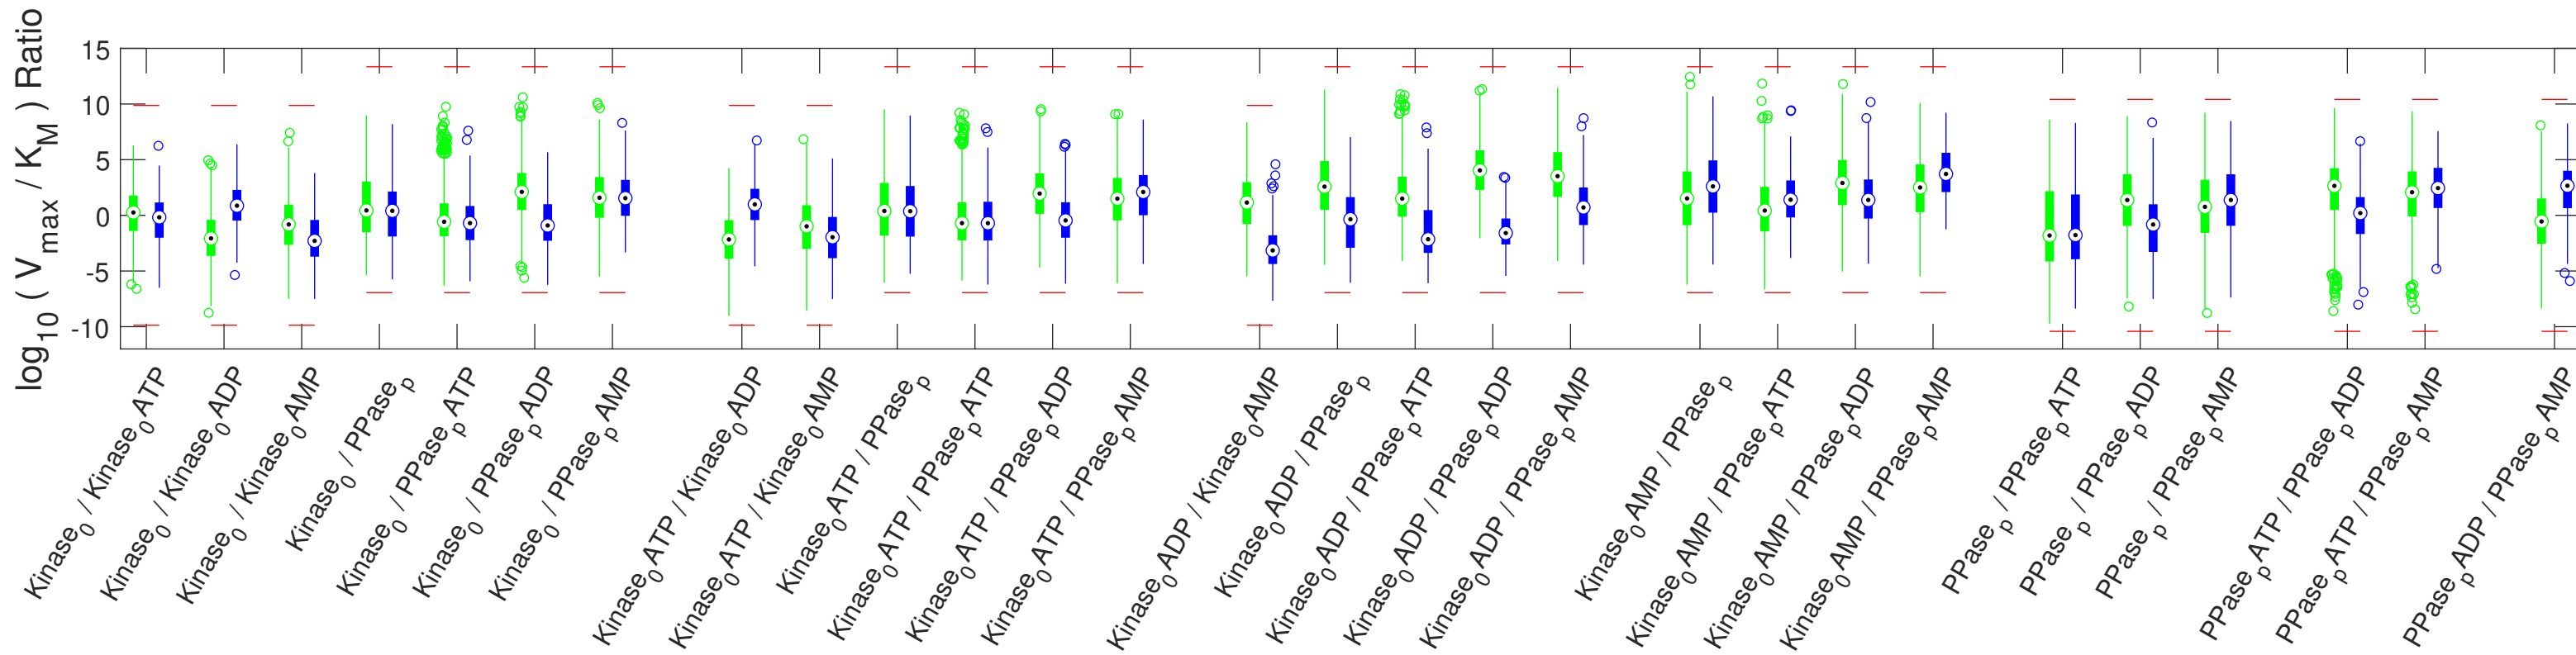

$\alpha 2\beta 2\gamma 3$  1.1x (Signal Concentration and Allosteric Activation)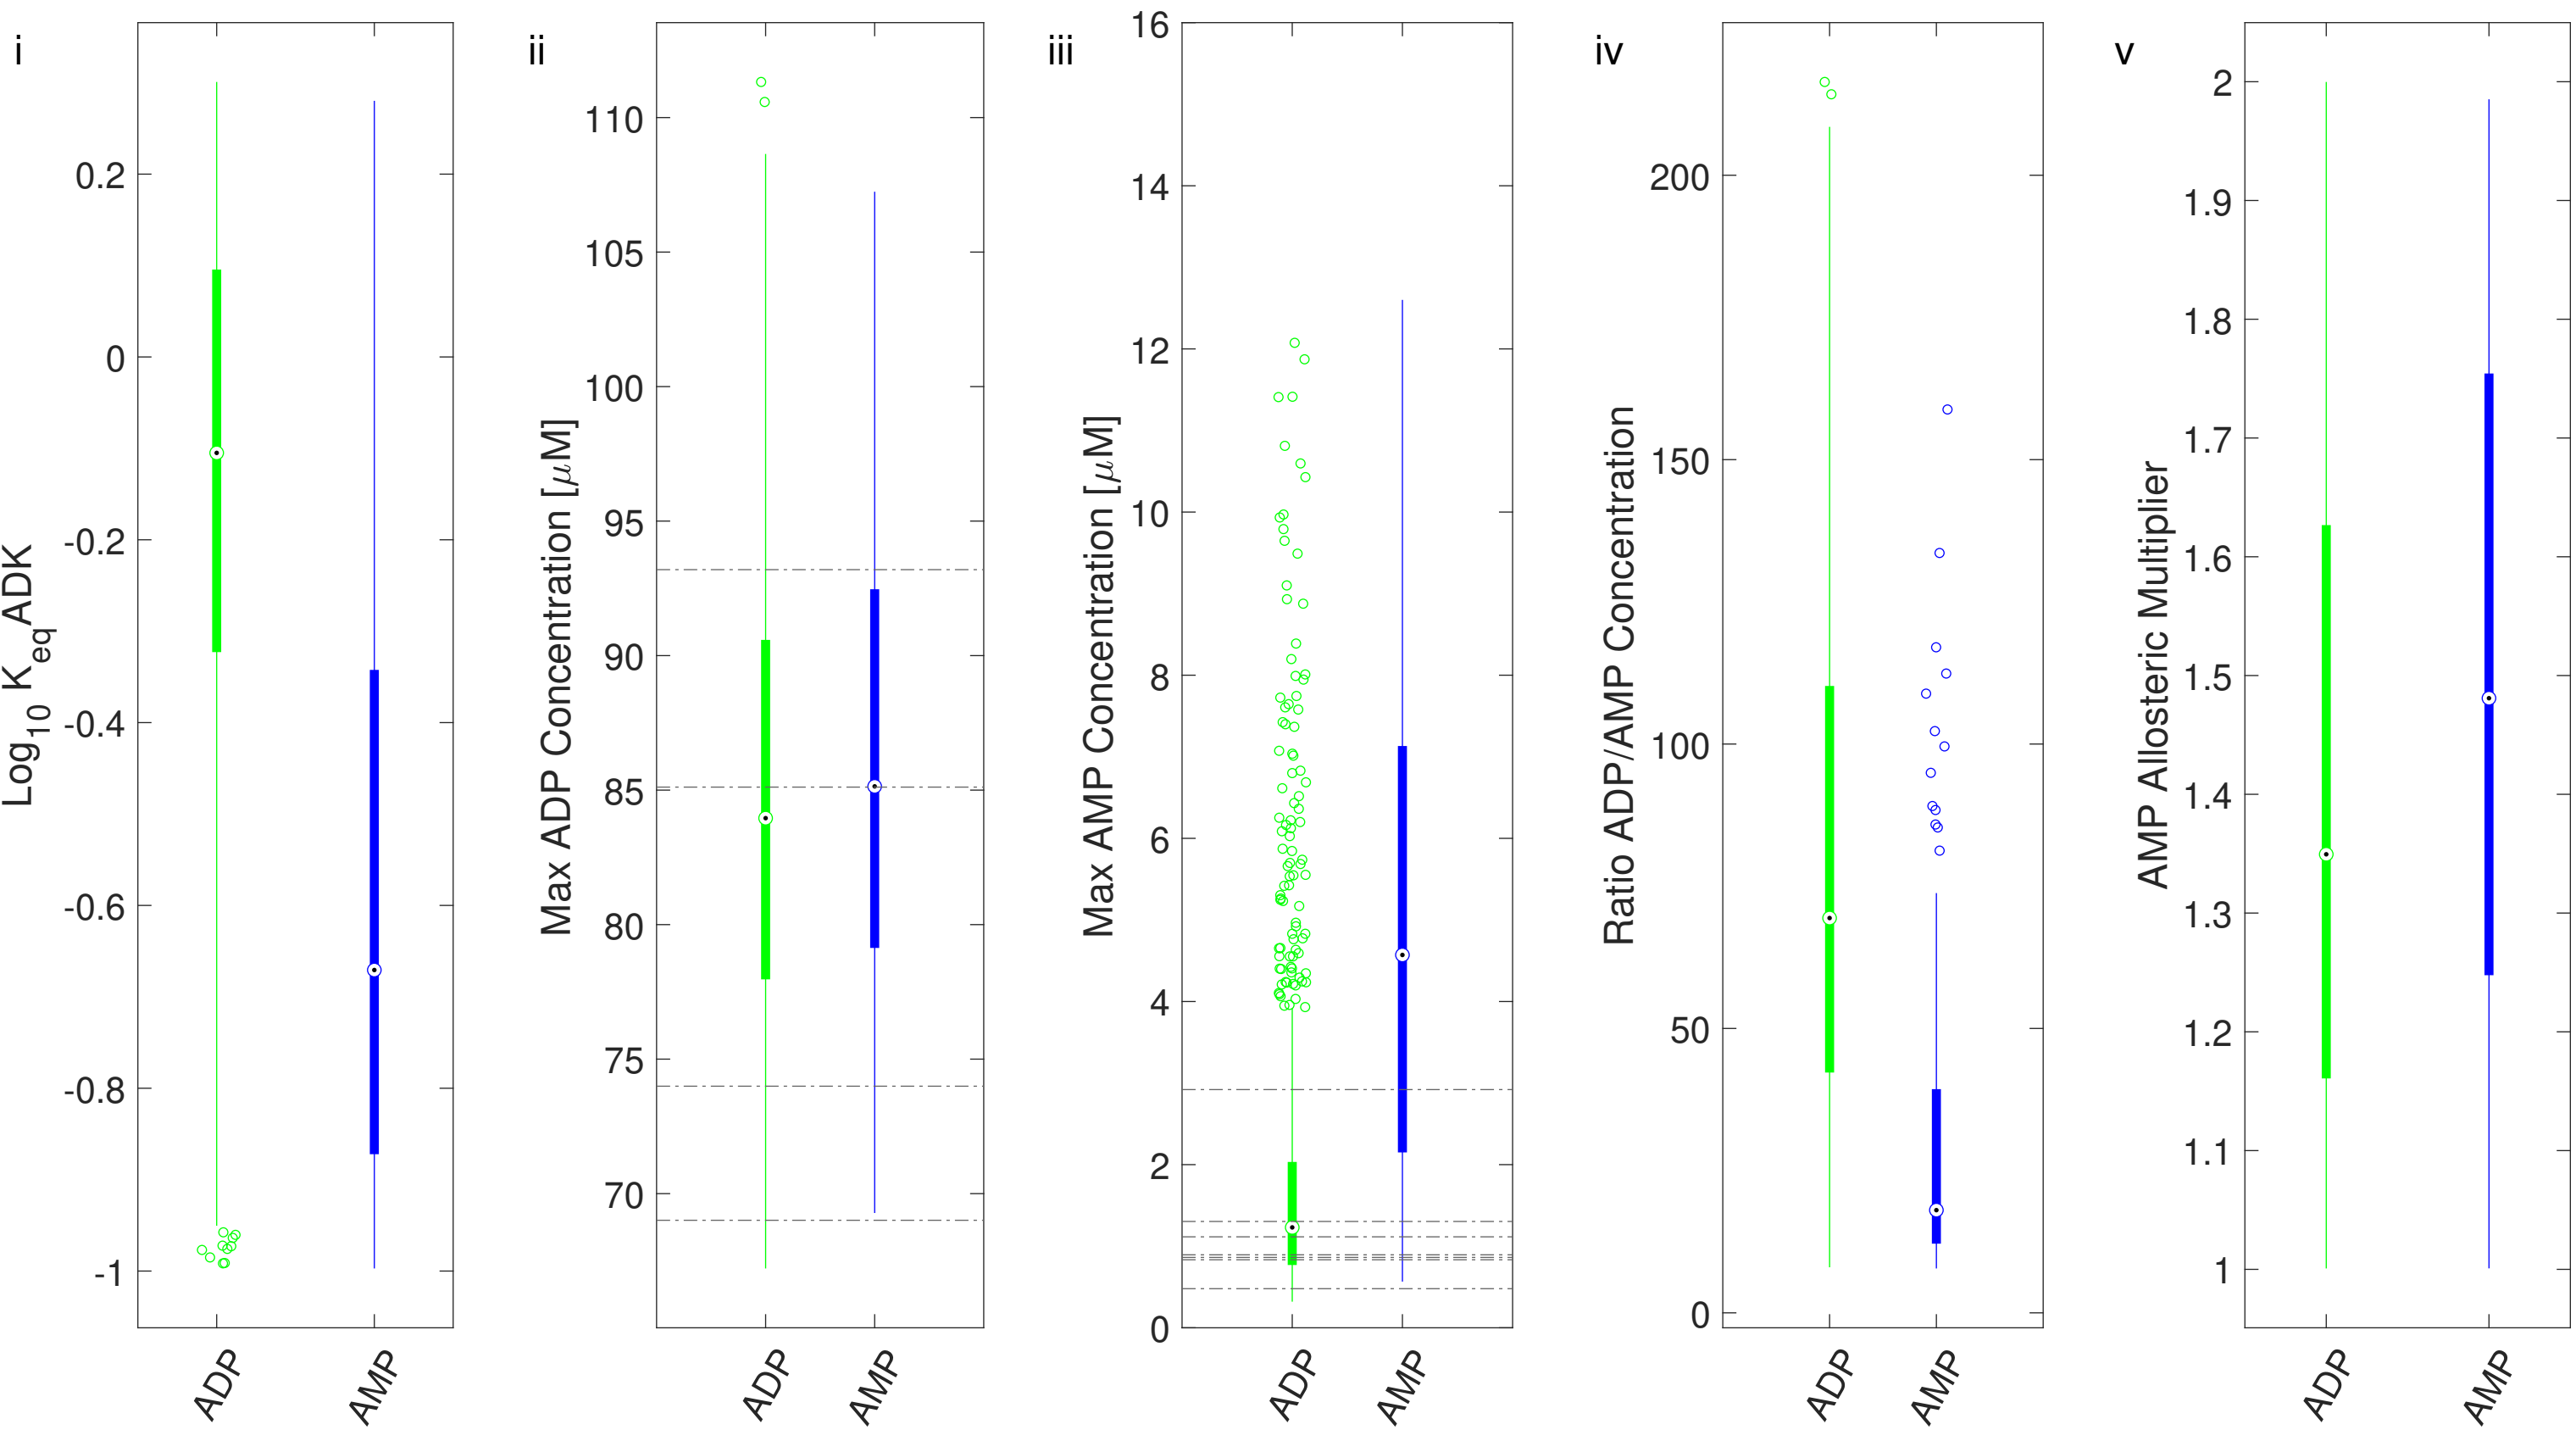

Supplement: pcbi.1008079.s006.pdf [file pcbi.1008079.s006.pdf]
